# Supplementary material for: The influence of halides in polyoxotitanate cages; dipole moment, splitting and expansion of d-orbitals and electron–electron repulsion
Source: Royal Society of Chemistry journal article supplement (doi:10.1039/c6dt04288k), 2016-12-12
Supplement: c6dt04288k1.pdf [file c6dt04288k1.pdf]

# The Influence of Halides in Polyoxotitanate Cages; Dipole Moment, Splitting and Expansion of d-orbitals and Electron-Electron Repulsion

Schirin Hanf,<sup>a</sup> Peter D Matthews,<sup>\*a,b</sup> Ning Li,<sup>a,c</sup> He-Kuan Luo<sup>c</sup> and Dominic S Wright<sup>\*a</sup>

---

<sup>a</sup> Department of Chemistry, University of Cambridge, Lensfield Road, Cambridge, CB2 1EW (UK). E-mail: [dsw1000@cam.ac.uk](mailto:dsw1000@cam.ac.uk)

<sup>b</sup> School of Chemistry, University of Manchester, Oxford Road, Manchester, M13 9PL (UK). E-mail: [peter.matthews-2@manchester.ac.uk](mailto:peter.matthews-2@manchester.ac.uk)

<sup>c</sup> Institute of Materials Research and Engineering, Agency for Science, Technology and Research, 2 Fusionopolis Way, #08-03, Innovis, Singapore 138634 (Singapore).

- 1)  $[\text{Ti}_3\text{O}(\text{O}^i\text{Pr})_9\text{X}]$  (X = F, Cl, Br, I)
- 2)  $[\text{Ti}_4\text{O}(\text{OEt})_{15}\text{CoX}]$  (X = F, Cl, Br, I) and  $[\text{Ti}_4\text{O}(\text{OEt})_{14}(\text{HOEt})]$
- 3)  $[\text{Ti}_7\text{O}_5(\text{OEt})_{19}\text{CoX}]$  (X = F, Cl, Br, I) and  $[\text{Ti}_7\text{O}_4(\text{OEt})_{20}]$
- 4) Diffuse reflectance UV-vis spectroscopy
- 5) Single-crystal X-ray crystallography

# 1) [Ti<sub>3</sub>O(O<sup>i</sup>Pr)<sub>9</sub>X]

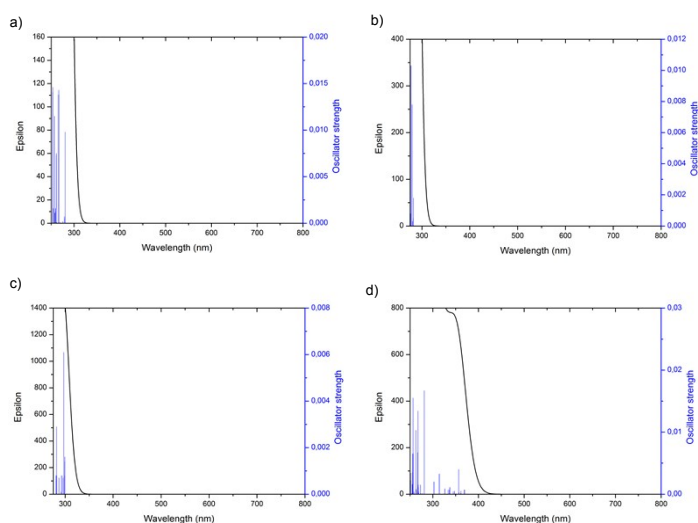

**Figure S1:** Calculated UV-Vis spectra of [Ti<sub>3</sub>O(O<sup>i</sup>Pr)<sub>9</sub>X] X = F (a), Cl (b), Br (c), I (d) using TD-DFT methods (B3LYP/6-31g\*\*, 6-311g\*\* for iodine).

**Table S1:** Atomic decomposition of molecular orbitals of [Ti<sub>3</sub>O(O<sup>i</sup>Pr)<sub>9</sub>F] (B3LYP/6-31g\*\* level of theory).

| Orbital | Orbital energy (eV) | Atomic composition (%) |        |          |         |
|---------|---------------------|------------------------|--------|----------|---------|
|         |                     | Titanium               | Oxygen | Fluorine | iPropyl |
| HOMO    | -6.85               | 1                      | 71     | 2        | 1       |
| HOMO-1  | -6.85               | 1                      | 71     | 2        | 1       |
| HOMO-2  | -7.10               | 4                      | 66     | 2        | 4       |
| LUMO    | -1.36               | 80                     | 14     | 1        | 6       |
| LUMO+1  | -1.36               | 80                     | 14     | 1        | 5       |
| LUMO+2  | -1.22               | 86                     | 11     | 0        | 3       |
| LUMO+3  | -1.11               | 89                     | 19     | 0        | 2       |

**Table S2:** Atomic decomposition of molecular orbitals of [Ti<sub>3</sub>O(O<sup>i</sup>Pr)<sub>9</sub>Cl] (B3LYP/6-31g\*\* level of theory).

| Orbital | Orbital energy (eV) | Atomic composition (%) |        |          |         |
|---------|---------------------|------------------------|--------|----------|---------|
|         |                     | Titanium               | Oxygen | Chlorine | iPropyl |
| HOMO    | -6.78               | 1                      | 47     | 35       | 16      |
| HOMO-1  | -6.78               | 1                      | 46     | 35       | 16      |
| HOMO-2  | -6.97               | 2                      | 40     | 44       | 13      |
| LUMO    | -1.37               | 85                     | 13     | 0        | 2       |
| LUMO+1  | -1.35               | 80                     | 14     | 0        | 6       |
| LUMO+2  | -1.35               | 80                     | 14     | 0        | 6       |
| LUMO+3  | -1.27               | 87                     | 10     | 0        | 3       |

**Table S3:** Atomic decomposition of molecular orbitals of [Ti<sub>3</sub>O(O<sup>i</sup>Pr)<sub>9</sub>Br] (B3LYP/6-31g\*\* level of theory).

| Orbital | Orbital energy (eV) | Atomic composition (%) |        |         |         |
|---------|---------------------|------------------------|--------|---------|---------|
|         |                     | Titanium               | Oxygen | Bromine | iPropyl |
| HOMO    | -6.50               | 3                      | 25     | 63      | 8       |
| HOMO-1  | -6.50               | 3                      | 25     | 63      | 8       |
| HOMO-2  | -6.70               | 3                      | 33     | 55      | 9       |
| LUMO    | -1.39               | 85                     | 13     | 0       | 2       |

|        |       |    |    |   |   |
|--------|-------|----|----|---|---|
| LUMO+1 | -1.36 | 80 | 13 | 0 | 6 |
| LUMO+2 | -1.36 | 80 | 14 | 0 | 6 |
| LUMO+3 | -1.28 | 87 | 10 | 0 | 3 |
| LUMO+4 | -1.19 | 83 | 13 | 0 | 4 |
| LUMO+5 | -1.19 | 83 | 13 | 0 | 4 |

**Table S4:** Atomic decomposition of molecular orbitals of  $[\text{Ti}_3\text{O}(\text{O}^i\text{Pr})_9]$  (B3LYP/6-31g\*\*, 6-311g\*\* for iodine level of theory).

| Orbital | Orbital energy (eV) | Atomic composition (%) |        |        |                     |
|---------|---------------------|------------------------|--------|--------|---------------------|
|         |                     | Titanium               | Oxygen | Iodine | <sup>i</sup> Propyl |
| HOMO    | -5.69               | 1                      | 5      | 91     | 3                   |
| HOMO-1  | -5.69               | 1                      | 5      | 91     | 3                   |
| HOMO-2  | -5.97               | 3                      | 16     | 79     | 3                   |
| LUMO    | -1.51               | 85                     | 13     | 0      | 2                   |
| LUMO+1  | -1.42               | 81                     | 13     | 0      | 6                   |
| LUMO+2  | -1.42               | 81                     | 13     | 0      | 6                   |
| LUMO+5  | -1.29               | 83                     | 13     | 0      | 4                   |
| LUMO+6  | -1.16               | 83                     | 14     | 0      | 3                   |
| LUMO+8  | -0.77               | 78                     | 13     | 3      | 6                   |

**Table S5:** Main orbital contributions to transition of  $[\text{Ti}_3\text{O}(\text{O}^i\text{Pr})_9\text{F}]$  (with oscillator strengths  $\geq 0.001$ ). Calculated employing TD-DFT methods (B3LYP/6-31g\*\*).

| Main orbital contributions                        | E <sub>g</sub> (eV) | E <sub>g</sub> (nm) | Oscillator strength |
|---------------------------------------------------|---------------------|---------------------|---------------------|
| HOMO-1 → LUMO+1<br>HOMO → LUMO+2<br>HOMO-2 → LUMO | 4.420               | 280.5               | 0.0098              |
| HOMO → LUMO+2                                     | 4.634               | 266.4               | 0.0143              |
| HOMO → LUMO                                       | 4.659               | 266.1               | 0.0138              |
| HOMO → LUMO+3                                     | 4.752               | 260.9               | 0.0075              |
| HOMO-1 → LUMO+3                                   | 4.755               | 260.8               | 0.0073              |

**Table S6:** Main orbital contributions to transition of  $[\text{Ti}_3\text{O}(\text{O}^i\text{Pr})_9\text{Cl}]$  (with oscillator strengths  $\geq 0.001$ ). Calculated employing TD-DFT methods (B3LYP/6-31g\*\*).

| Main orbital contributions                        | E <sub>g</sub> (eV) | E <sub>g</sub> (nm) | Oscillator strength |
|---------------------------------------------------|---------------------|---------------------|---------------------|
| HOMO-1 → LUMO+1<br>HOMO → LUMO+2<br>HOMO-2 → LUMO | 4.392               | 282.3               | 0.0018              |
| HOMO-1 → LUMO                                     | 4.439               | 279.3               | 0.0078              |
| HOMO → LUMO                                       | 4.439               | 279.3               | 0.0077              |
| HOMO → LUMO<br>HOMO → LUMO+3                      | 4.476               | 277.0               | 0.0103              |
| HOMO-1 → LUMO<br>HOMO-1 → LUMO+3                  | 4.476               | 277.0               | 0.0103              |

**Table S7:** Main orbital contributions to transition of  $[\text{Ti}_3\text{O}(\text{O}^i\text{Pr})_9\text{Br}]$  (with oscillator strengths  $\geq 0.001$ ). Calculated employing TD-DFT methods (B3LYP/6-31g\*\*).

| Main orbital contributions                               | Eg (eV) | Eg (nm) | Oscillator strength |
|----------------------------------------------------------|---------|---------|---------------------|
| HOMO $\rightarrow$ LUMO<br>HOMO $\rightarrow$ LUMO+1     | 4.141   | 299.4   | 0.0016              |
| HOMO-1 $\rightarrow$ LUMO                                | 4.144   | 299.1   | 0.0014              |
| HOMO-1 $\rightarrow$ LUMO                                | 4.172   | 297.2   | 0.0061              |
| HOMO-1 $\rightarrow$ LUMO                                | 4.173   | 297.1   | 0.0058              |
| HOMO-1 $\rightarrow$ LUMO+1<br>HOMO $\rightarrow$ LUMO+5 | 4.395   | 282.1   | 0.0029              |

**Table S8:** Main orbital contributions to transition of  $[\text{Ti}_3\text{O}(\text{O}^i\text{Pr})_9\text{I}]$  (with oscillator strengths  $\geq 0.001$ ). Calculated employing TD-DFT methods (B3LYP/6-31g\*\*, 6-311g\*\* for iodine).

| Main orbital contributions                                 | Eg (eV) | Eg (nm) | Oscillator strength |
|------------------------------------------------------------|---------|---------|---------------------|
| HOMO-2 $\rightarrow$ LUMO+1<br>HOMO-2 $\rightarrow$ LUMO+2 | 3.675   | 337.4   | 0.0011              |
| HOMO-2 $\rightarrow$ LUMO+1<br>HOMO $\rightarrow$ LUMO+5   | 3.677   | 337.2   | 0.0011              |
| HOMO-2 $\rightarrow$ LUMO+6                                | 3.945   | 314.3   | 0.0033              |
| HOMO-2 $\rightarrow$ LUMO+8                                | 4.410   | 281.2   | 0.0167              |

**Table S9:** Band gaps obtained DOS calculations (B3LYP/6-31g\*\*, 6-311g\*\* for iodine).

| Compound | Eg (eV) |
|----------|---------|
| 1-F      | 5.49    |
| 1-Cl     | 5.41    |
| 1-Br     | 5.11    |
| 1-I      | 4.18    |

**Table S10:** Band gaps obtained from TD-DFT calculations (B3LYP/6-31g\*\*, 6-311g\*\* for iodine). First singlet excitation energy with oscillator strength  $\geq 0$ .

| Compound | Main orbital contributions                               | Eg (eV) | Eg (nm) | Oscillator strength |
|----------|----------------------------------------------------------|---------|---------|---------------------|
| 1-F      | HOMO-1 $\rightarrow$ LUMO+1<br>HOMO $\rightarrow$ LUMO   | 4.420   | 280.5   | 0.0098              |
| 1-Cl     | HOMO-1 $\rightarrow$ LUMO+1<br>HOMO $\rightarrow$ LUMO+2 | 4.392   | 282.3   | 0.0018              |
| 1-Br     | HOMO $\rightarrow$ LUMO<br>HOMO $\rightarrow$ LUMO+1     | 4.142   | 299.4   | 0.0016              |
| 1-I      | HOMO $\rightarrow$ LUMO                                  | 3.357   | 369.3   | 0.0007              |

## 2) $[\text{Ti}_4\text{O}(\text{OEt})_{15}\text{CoX}]$ ( $X = \text{F}, \text{Cl}, \text{Br}, \text{I}$ ) and $[\text{Ti}_4\text{O}(\text{OEt})_{14}(\text{HOEt})]$

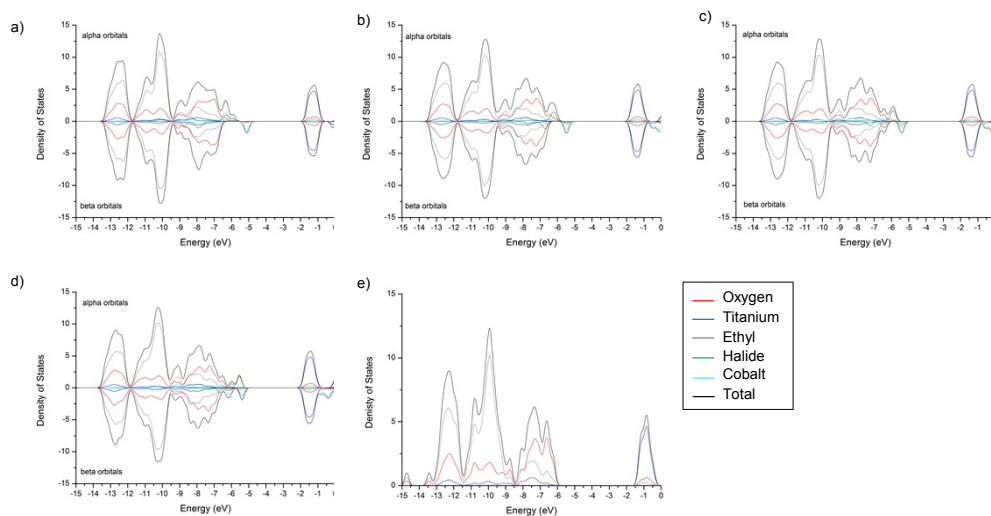

**Figure S2:** Density of states diagrams of  $[\text{Ti}_4\text{O}(\text{OEt})_{15}\text{CoX}]$   $X = \text{F}$  (a),  $\text{Cl}$  (b),  $\text{Br}$  (c),  $\text{I}$  (d) and the undoped  $\text{Ti}_4$  cage. Calculated on a B3LYP/6-31g\*, 6-311g\* (for iodine) level of theory. Spin-up ( $\alpha$  orbitals) and spin-down channels ( $\beta$  orbitals) are distinguished by the positive and negative signs of DOS.

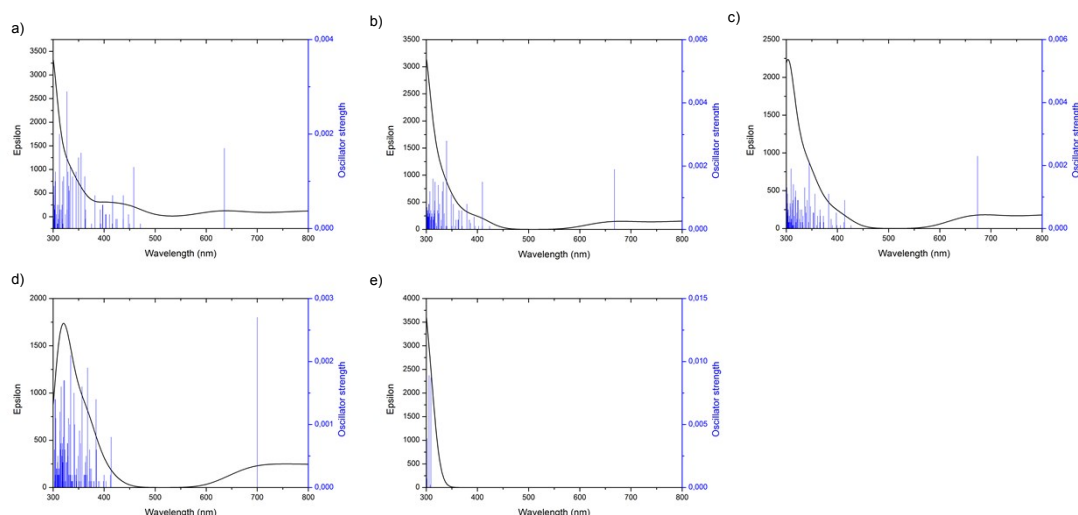

**Figure S3:** Calculated UV-Vis spectra of  $[\text{Ti}_4\text{O}(\text{OEt})_{15}\text{CoX}]$   $X = \text{F}$  (a),  $\text{Cl}$  (b),  $\text{Br}$  (c),  $\text{I}$  (d) and the undoped  $[\text{Ti}_4\text{O}(\text{OEt})_{14}(\text{HOEt})]$  cage (e) using TD-DFT methods (B3LYP/6-31g\*, 6-311g\* for iodine).

**Table S11:** Atomic composition of molecular orbitals of  $[\text{Ti}_4\text{O}(\text{OEt})_{15}\text{CoF}]$  (B3LYP/6-31g\* level of theory).

| Orbital           | Orbital energy (eV) | Atomic composition (%) |        |        |          |       |
|-------------------|---------------------|------------------------|--------|--------|----------|-------|
|                   |                     | Titanium               | Cobalt | Oxygen | Fluorine | Ethyl |
| HOMO- $\alpha$    | -5.88               | 3                      | 46     | 33     | 11       | 7     |
| HOMO- $\alpha$ -1 | -6.22               | 2                      | 40     | 46     | 2        | 12    |
| HOMO- $\alpha$ -4 | -6.44               | 0                      | 53     | 13     | 29       | 5     |
| LUMO- $\alpha$    | -1.59               | 84                     | 0      | 11     | 0        | 5     |
| LUMO- $\alpha$ +1 | -1.52               | 85                     | 0      | 12     | 0        | 3     |
| LUMO- $\alpha$ +2 | -1.48               | 87                     | 0      | 10     | 0        | 3     |
| LUMO- $\alpha$ +3 | -1.45               | 85                     | 0      | 11     | 0        | 4     |
| LUMO- $\alpha$ +4 | -1.34               | 84                     | 0      | 12     | 0        | 4     |
|                   |                     |                        |        |        |          |       |
| HOMO- $\beta$     | -5.05               | 1                      | 80     | 9      | 8        | 2     |
| HOMO- $\beta$ -1  | -5.16               | 1                      | 82     | 9      | 7        | 2     |
| LUMO- $\beta$     | -1.59               | 84                     | 1      | 11     | 0        | 5     |
| LUMO- $\beta$ +1  | -1.53               | 84                     | 0      | 12     | 0        | 4     |
| LUMO- $\beta$ +14 | 0.32                | 69                     | 13     | 10     | 0        | 8     |
| LUMO- $\beta$ +15 | 0.42                | 32                     | 56     | 6      | 2        | 4     |
| LUMO- $\beta$ +16 | 0.67                | 56                     | 24     | 10     | 1        | 9     |
| LUMO- $\beta$ +18 | 0.84                | 43                     | 39     | 11     | 3        | 5     |

**Table S12:** Atomic composition of molecular orbitals of [Ti<sub>4</sub>O(OEt)<sub>15</sub>CoCl] (B3LYP/6-31g\* level of theory).

| Orbital           | Orbital energy (eV) | Atomic composition (%) |        |        |          |       |
|-------------------|---------------------|------------------------|--------|--------|----------|-------|
|                   |                     | Titanium               | Cobalt | Oxygen | Chlorine | Ethyl |
| HOMO- $\alpha$    | -6.08               | 1                      | 31     | 24     | 35       | 6     |
| HOMO- $\alpha$ -1 | -6.19               | 0                      | 19     | 4      | 74       | 3     |
| HOMO- $\alpha$ -3 | -6.44               | 1                      | 27     | 53     | 6        | 12    |
| LUMO- $\alpha$    | -1.70               | 85                     | 0      | 10     | 0        | 5     |
| LUMO- $\alpha$ +1 | -1.59               | 84                     | 0      | 11     | 0        | 4     |
| LUMO- $\alpha$ +4 | -1.46               | 84                     | 0      | 12     | 0        | 4     |
|                   |                     |                        |        |        |          |       |
| HOMO- $\beta$     | -5.42               | 1                      | 69     | 9      | 19       | 2     |
| HOMO- $\beta$ -1  | -5.42               | 1                      | 70     | 10     | 17       | 2     |
| LUMO- $\beta$     | -1.71               | 85                     | 1      | 9      | 0        | 5     |
| LUMO- $\beta$ +12 | -0.48               | 31                     | 62     | 4      | 2        | 1     |
| LUMO- $\beta$ +13 | -0.17               | 6                      | 85     | 5      | 1        | 3     |
| LUMO- $\beta$ +14 | 0.01                | 18                     | 72     | 6      | 1        | 3     |
| LUMO- $\beta$ +16 | 0.40                | 53                     | 27     | 11     | 2        | 7     |

**Table S13:** Atomic composition of molecular orbitals of [Ti<sub>4</sub>O(OEt)<sub>15</sub>CoBr] (B3LYP/6-31g\* level of theory).

| Orbital           | Orbital energy (eV) | Atomic composition (%) |        |        |         |       |
|-------------------|---------------------|------------------------|--------|--------|---------|-------|
|                   |                     | Titanium               | Cobalt | Oxygen | Bromine | Ethyl |
| HOMO- $\alpha$    | -5.84               | 0                      | 13     | 2      | 82      | 3     |
| HOMO- $\alpha$ -1 | -5.86               | 0                      | 17     | 6      | 75      | 3     |
| LUMO- $\alpha$    | -1.69               | 85                     | 0      | 10     | 0       | 5     |
| LUMO- $\alpha$ +1 | -1.59               | 85                     | 0      | 11     | 0       | 4     |
| LUMO- $\alpha$ +2 | -1.53               | 86                     | 0      | 11     | 0       | 3     |
| LUMO- $\alpha$ +4 | -1.46               | 84                     | 0      | 12     | 0       | 4     |
|                   |                     |                        |        |        |         |       |
| HOMO- $\beta$     | -5.34               | 0                      | 55     | 7      | 35      | 2     |
| HOMO- $\beta$ -1  | -5.45               | 1                      | 58     | 9      | 31      | 2     |
| HOMO- $\beta$ -3  | -6.48               | 0                      | 32     | 10     | 53      | 5     |
| LUMO- $\beta$     | -1.71               | 84                     | 1      | 10     | 0       | 5     |
| LUMO- $\beta$ +2  | -1.54               | 84                     | 2      | 10     | 0       | 3     |
| LUMO- $\beta$ +4  | -1.50               | 81                     | 3      | 12     | 0       | 3     |
| LUMO- $\beta$ +6  | -1.34               | 84                     | 2      | 11     | 0       | 3     |
| LUMO- $\beta$ +7  | -1.28               | 83                     | 1      | 12     | 0       | 4     |
| LUMO- $\beta$ +8  | -1.23               | 83                     | 1      | 13     | 0       | 4     |
| LUMO- $\beta$ +10 | -1.10               | 82                     | 0      | 13     | 0       | 4     |
| LUMO- $\beta$ +12 | -0.54               | 28                     | 66     | 4      | 2       | 1     |
| LUMO- $\beta$ +13 | -0.24               | 6                      | 84     | 6      | 2       | 3     |
| LUMO- $\beta$ +16 | 0.38                | 57                     | 23     | 11     | 2       | 7     |

**Table S14:** Atomic composition of molecular orbitals of [Ti<sub>4</sub>O(OEt)<sub>15</sub>Co] (B3LYP/6-31g\*, 6-311g\* (for iodine) level of theory).

| Orbital           | Orbital energy (eV) | Atomic composition (%) |        |        |        |       |
|-------------------|---------------------|------------------------|--------|--------|--------|-------|
|                   |                     | Titanium               | Cobalt | Oxygen | Iodine | Ethyl |
| HOMO- $\alpha$    | -5.51               | 0                      | 4      | 1      | 93     | 2     |
| LUMO- $\alpha$    | -1.77               | 85                     | 0      | 10     | 0      | 5     |
| HOMO- $\beta$     | -5.32               | 0                      | 26     | 4      | 68     | 2     |
| HOMO- $\beta$ -1  | -5.42               | 1                      | 26     | 4      | 68     | 2     |
| HOMO- $\beta$ -2  | -6.06               | 0                      | 49     | 17     | 28     | 6     |
| HOMO- $\beta$ -3  | -6.25               | 0                      | 61     | 9      | 26     | 5     |
| LUMO- $\beta$     | -1.79               | 84                     | 2      | 9      | 0      | 5     |
| LUMO- $\beta$ +4  | -1.58               | 81                     | 4      | 12     | 0      | 4     |
| LUMO- $\beta$ +5  | -1.46               | 82                     | 3      | 11     | 0      | 4     |
| LUMO- $\beta$ +8  | -1.32               | 83                     | 0      | 14     | 0      | 3     |
| LUMO- $\beta$ +13 | -0.45               | 7                      | 84     | 6      | 1      | 3     |
| LUMO- $\beta$ +14 | -0.28               | 10                     | 80     | 6      | 2      | 2     |

**Table S15:** Atomic composition of molecular orbitals of [Ti<sub>4</sub>O(OEt)<sub>14</sub>(HOEt)] (B3LYP/6-31g\* level of theory).

| Orbital | Orbital energy (eV) | Atomic composition |        |       |
|---------|---------------------|--------------------|--------|-------|
|         |                     | Titanium           | Oxygen | Ethyl |
| HOMO    | -6.22               | 2                  | 78     | 20    |
| HOMO-1  | -6.23               | 2                  | 77     | 21    |
| LUMO    | -1.23               | 84                 | 12     | 4     |
| LUMO+1  | -1.19               | 84                 | 12     | 5     |
| LUMO+2  | -1.10               | 85                 | 12     | 4     |

**Table S16:** Main orbital contributions to transition of [Ti<sub>4</sub>O(OEt)<sub>15</sub>CoF] (with oscillator strengths  $\geq 0.001$ ). Calculated employing TD-DFT methods (B3LYP/6-31g\*).

| Main orbital contributions                        | E <sub>g</sub> (eV) | E <sub>g</sub> (nm) | Oscillator strength |
|---------------------------------------------------|---------------------|---------------------|---------------------|
| HOMO- $\beta$ -1 $\rightarrow$ LUMO- $\beta$ +12  | 1.956               | 635.6               | 0.0017              |
| HOMO- $\beta$ -1 $\rightarrow$ LUMO- $\beta$ +15  |                     |                     |                     |
| HOMO- $\beta$ -1 $\rightarrow$ LUMO- $\beta$ +16  |                     |                     |                     |
| HOMO- $\beta$ -1 $\rightarrow$ LUMO- $\beta$ +18  |                     |                     |                     |
| HOMO- $\beta$ $\rightarrow$ LUMO- $\beta$         | 2.707               | 458.0               | 0.0013              |
| HOMO- $\beta$ $\rightarrow$ LUMO- $\beta$ +1      |                     |                     |                     |
| HOMO- $\alpha$ $\rightarrow$ LUMO- $\alpha$       | 3.496               | 354.7               | 0.0016              |
| HOMO- $\alpha$ $\rightarrow$ LUMO- $\alpha$ +1    |                     |                     |                     |
| HOMO- $\alpha$ $\rightarrow$ LUMO- $\alpha$ +2    | 3.544               | 349.8               | 0.0015              |
| HOMO- $\alpha$ $\rightarrow$ LUMO- $\alpha$ +3    |                     |                     |                     |
| HOMO- $\alpha$ -1 $\rightarrow$ LUMO- $\alpha$ +1 | 3.714               | 333.8               | 0.0013              |
| HOMO- $\alpha$ $\rightarrow$ LUMO- $\alpha$ +2    |                     |                     |                     |
| HOMO- $\alpha$ $\rightarrow$ LUMO- $\alpha$ +4    |                     |                     |                     |



**Table S17:** Main orbital contributions to transition of [Ti<sub>4</sub>O(OEt)<sub>15</sub>CoCl] (with oscillator strengths  $\geq 0.001$ ). Calculated employing TD-DFT methods (B3LYP/6-31g\*).

| Main orbital contributions                                      | E <sub>g</sub> (eV) | E <sub>g</sub> (nm) | Oscillator strength |
|-----------------------------------------------------------------|---------------------|---------------------|---------------------|
| HOMO-β-1 → LUMO-β+12<br>HOMO-β → LUMO-β+13                      | 1.442               | 859.7               | 0.0013              |
| HOMO-β-1 → LUMO-β+14<br>HOMO-β-1 → LUMO-β+16                    | 1.857               | 667.8               | 0.0019              |
| HOMO-α → LUMO-α+1                                               | 3.652               | 339.5               | 0.0028              |
| HOMO-α-3 → LUMO-α+1<br>HOMO-α-3 → LUMO-α+4<br>HOMO-α-1 → LUMO-α | 3.834               | 323.3               | 0.0014              |

**Table S18:** Main orbital contributions to transition of [Ti<sub>4</sub>O(OEt)<sub>15</sub>CoBr] (with oscillator strengths  $\geq 0.001$ ). Calculated employing TD-DFT methods (B3LYP/6-31g\*).

| Main orbital contributions                                                                | E <sub>g</sub> (eV) | E <sub>g</sub> (nm) | Oscillator strength |
|-------------------------------------------------------------------------------------------|---------------------|---------------------|---------------------|
| HOMO-β-3 → LUMO-β+13<br>HOMO-β-1 → LUMO-β+12<br>HOMO-β → LUMO-β+13                        | 1.427               | 868.91              | 0.0017              |
| HOMO-β-1 → LUMO-β+14<br>HOMO-β-1 → LUMO-β+16                                              | 1.525               | 673.8               | 0.0023              |
| HOMO-β → LUMO-β+2<br>HOMO-β → LUMO-β+4                                                    | 3.239               | 382.8               | 0.0011              |
| HOMO-β-1 → LUMO-β+6<br>HOMO-β-1 → LUMO-β+7<br>HOMO-β-1 → LUMO-β+8<br>HOMO-β-1 → LUMO-β+10 | 3.482               | 356.1               | 0.0011              |
| HOMO-α-1 → LUMO-α+1                                                                       | 3.597               | 344.7               | 0.0021              |
| HOMO-α-1 → LUMO-α+2<br>HOMO-α-1 → LUMO-α+4<br>HOMO-α → LUMO-α+1                           | 3.691               | 335.9               | 0.0013              |

**Table S19:** Main orbital contributions to transition of [Ti<sub>4</sub>O(OEt)<sub>15</sub>CoI] (with oscillator strengths  $\geq 0.001$ ). Calculated employing TD-DFT methods (B3LYP/6-31g\*).

| Main orbital contributions                   | E <sub>g</sub> (eV) | E <sub>g</sub> (nm) | Oscillator strength |
|----------------------------------------------|---------------------|---------------------|---------------------|
| HOMO-β-3 → LUMO-β+13<br>HOMO-β → LUMO-β+13   | 1.433               | 865.4               | 0.0021              |
| HOMO-β-2 → LUMO-β+14<br>HOMO-β-1 → LUMO-β+14 | 1.771               | 700.0               | 0.0027              |
| HOMO-α → LUMO-α<br>HOMO-β → LUMO-β+4         | 3.227               | 384.2               | 0.0014              |
| HOMO-β-1 → LUMO-β+5                          | 3.374               | 367.4               | 0.0019              |
| HOMO-β-1 → LUMO-β+8                          | 3.475               | 356.8               | 0.0016              |

**Table S20:** Main orbital contributions to transition of [Ti<sub>4</sub>O(OEt)<sub>14</sub>(HOEt)] (with oscillator strengths  $\geq 0.001$ ). Calculated employing TD-DFT methods (B3LYP/6-31g\*).

| Main orbital contributions       | E <sub>g</sub> (eV) | E <sub>g</sub> (nm) | Oscillator strength |
|----------------------------------|---------------------|---------------------|---------------------|
| HOMO-1 → LUMO<br>HOMO-1 → LUMO+1 | 4.013               | 308.9               | 0.0087              |
| HOMO-1 → LUMO+1<br>HOMO → LUMO+1 | 4.060               | 305.4               | 0.0089              |
| HOMO → LUMO                      | 4.105               | 302.0               | 0.0039              |
| HOMO-1 → LUMO+2                  | 4.155               | 298.4               | 0.0059              |



### 3) [Ti<sub>7</sub>O<sub>5</sub>(OEt)<sub>19</sub>CoX] (X = F, Cl, Br, I) and [Ti<sub>7</sub>O<sub>4</sub>(OEt)<sub>20</sub>]

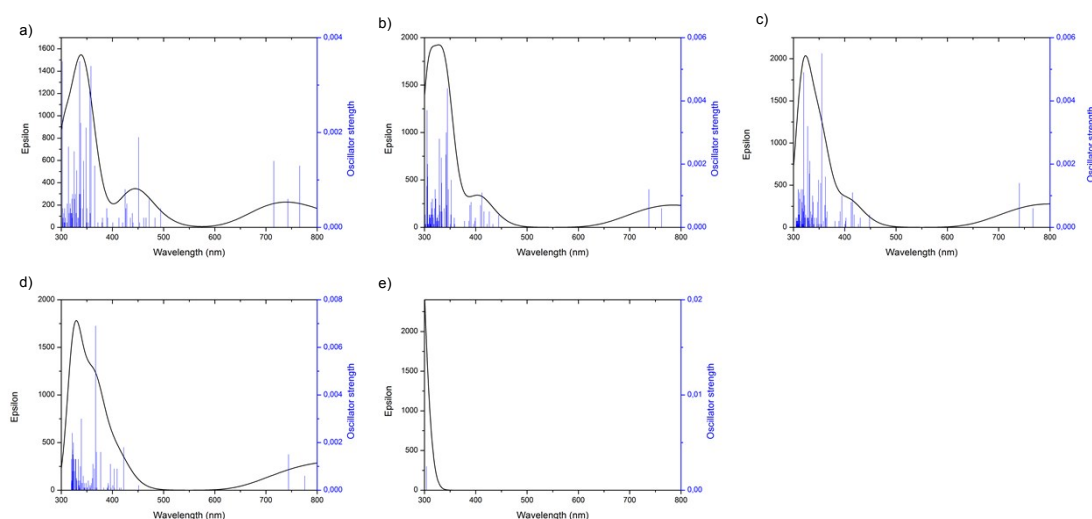

**Figure S4:** Calculated UV-Vis spectra of [Ti<sub>7</sub>O<sub>5</sub>(OEt)<sub>19</sub>CoX] X = F (a), Cl (b), Br (c), I (d) and [Ti<sub>7</sub>O<sub>4</sub>(OEt)<sub>20</sub>] (e) using TD-DFT methods (B3LYP/6-31g\*, 6-311g\* for iodine).

**Table S21:** Atomic composition of molecular orbitals of [Ti<sub>7</sub>O<sub>5</sub>(OEt)<sub>19</sub>CoF] (B3LYP/6-31g\* level of theory).

| Orbital           | Orbital energy (eV) | Atomic composition (%) |        |        |          |       |
|-------------------|---------------------|------------------------|--------|--------|----------|-------|
|                   |                     | Titanium               | Cobalt | Oxygen | Fluorine | Ethyl |
| HOMO- $\alpha$    | -6.00               | 3                      | 50     | 20     | 24       | 3     |
| HOMO- $\alpha$ -1 | -6.12               | 3                      | 38     | 41     | 7        | 10    |
| HOMO- $\alpha$ -2 | -6.22               | 3                      | 42     | 44     | 2        | 10    |
| HOMO- $\alpha$ -4 | -6.48               | 1                      | 50     | 12     | 33       | 5     |
| LUMO- $\alpha$    | -1.72               | 89                     | 0      | 9      | 0        | 2     |
| LUMO- $\alpha$ +1 | -1.64               | 87                     | 0      | 10     | 0        | 3     |
| LUMO- $\alpha$ +2 | -1.61               | 86                     | 0      | 11     | 0        | 3     |
| HOMO- $\beta$     | -5.06               | 1                      | 80     | 10     | 8        | 2     |
| HOMO- $\beta$ -1  | -5.13               | 1                      | 82     | 7      | 7        | 2     |
| LUMO- $\beta$     | -1.72               | 89                     | 1      | 8      | 0        | 2     |
| LUMO- $\beta$ +1  | -1.66               | 87                     | 2      | 9      | 0        | 2     |
| LUMO- $\beta$ +2  | -1.61               | 85                     | 0      | 11     | 0        | 4     |
| LUMO- $\beta$ +4  | -1.51               | 86                     | 0      | 11     | 0        | 3     |
| LUMO- $\beta$ +14 | -1.09               | 86                     | 0      | 11     | 0        | 3     |
| LUMO- $\beta$ +15 | -1.00               | 82                     | 0      | 14     | 0        | 4     |
| LUMO- $\beta$ +16 | -0.97               | 85                     | 0      | 12     | 0        | 3     |
| LUMO- $\beta$ +17 | -0.92               | 81                     | 0      | 15     | 0        | 3     |
| LUMO- $\beta$ +18 | -0.83               | 84                     | 0      | 14     | 0        | 3     |
| LUMO- $\beta$ +22 | 0.005               | 62                     | 27     | 7      | 1        | 3     |
| LUMO- $\beta$ +23 | 0.28                | 35                     | 52     | 7      | 1        | 5     |
| LUMO- $\beta$ +25 | 0.39                | 50                     | 33     | 10     | 2        | 6     |
| LUMO- $\beta$ +26 | 0.47                | 9                      | 81     | 6      | 1        | 2     |

**Table S22:** Atomic composition of molecular orbitals of  $[\text{Ti}_7\text{O}_5(\text{OEt})_{19}\text{CoCl}]$  (B3LYP/6-31g\* level of theory).

| Orbital           | Orbital energy (eV) | Atomic composition (%) |        |        |          |       |
|-------------------|---------------------|------------------------|--------|--------|----------|-------|
|                   |                     | Titanium               | Cobalt | Oxygen | Chlorine | Ethyl |
| HOMO- $\alpha$    | -6.13               | 1                      | 29     | 14     | 52       | 3     |
| HOMO- $\alpha$ -1 | -6.16               | 0                      | 22     | 7      | 68       | 3     |
| HOMO- $\alpha$ -2 | -6.17               | 0                      | 22     | 12     | 62       | 3     |
| HOMO- $\alpha$ -3 | -6.41               | 3                      | 28     | 46     | 12       | 11    |
| HOMO- $\alpha$ -4 | -6.44               | 3                      | 30     | 50     | 5        | 12    |
| LUMO- $\alpha$    | -1.80               | 90                     | 0      | 9      | 0        | 2     |
| LUMO- $\alpha$ +1 | -1.72               | 87                     | 0      | 9      | 0        | 2     |
|                   |                     |                        |        |        |          |       |
| HOMO- $\beta$     | -5.40               | 1                      | 67     | 10     | 20       | 2     |
| HOMO- $\beta$ -1  | -5.48               | 1                      | 71     | 7      | 19       | 2     |
| LUMO- $\beta$     | -1.80               | 89                     | 1      | 8      | 0        | 2     |
| LUMO- $\beta$ +1  | -1.76               | 86                     | 3      | 9      | 0        | 2     |
| LUMO- $\beta$ +2  | -1.70               | 58                     | 0      | 11     | 0        | 4     |
| LUMO- $\beta$ +8  | -1.40               | 83                     | 0      | 13     | 0        | 2     |
| LUMO- $\beta$ +13 | -1.19               | 85                     | 0      | 13     | 0        | 2     |
| LUMO- $\beta$ +20 | -0.30               | 25                     | 58     | 5      | 2        | 2     |
| LUMO- $\beta$ +21 | -0.20               | 14                     | 76     | 6      | 1        | 2     |
| LUMO- $\beta$ +23 | -0.01               | 45                     | 40     | 13     | 1        | 2     |
| LUMO- $\beta$ +24 | 0.03                | 34                     | 52     | 11     | 1        | 2     |

**Table S23:** Atomic composition of molecular orbitals of  $[\text{Ti}_7\text{O}_5(\text{OEt})_{19}\text{CoBr}]$  (B3LYP/6-31g\* level of theory).

| Orbital           | Orbital energy (eV) | Atomic composition (%) |        |        |         |       |
|-------------------|---------------------|------------------------|--------|--------|---------|-------|
|                   |                     | Titanium               | Cobalt | Oxygen | Bromine | Ethyl |
| HOMO- $\alpha$    | -5.8                | 0                      | 13     | 2      | 83      | 3     |
| HOMO- $\alpha$ -1 | -5.84               | 0                      | 13     | 2      | 83      | 2     |
| HOMO- $\alpha$ -2 | -5.97               | 1                      | 33     | 14     | 50      | 2     |
| HOMO- $\alpha$ -4 | -6.44               | 3                      | 28     | 55     | 1       | 14    |
| LUMO              | -1.79               | 86                     | 0      | 9      | 0       | 2     |
| LUMO- $\alpha$ +1 | -1.71               | 87                     | 0      | 10     | 0       | 3     |
| LUMO- $\alpha$ +2 | -1.60               | 89                     | 0      | 11     | 0       | 4     |
|                   |                     |                        |        |        |         |       |
| HOMO- $\beta$     | -5.31               | 0                      | 54     | 8      | 35      | 2     |
| HOMO- $\beta$ -1  | -5.41               | 1                      | 57     | 6      | 34      | 2     |
| LUMO- $\beta$     | -1.79               | 89                     | 1      | 8      | 0       | 2     |
| LUMO- $\beta$ +1  | -1.75               | 86                     | 3      | 9      | 0       | 2     |
| LUMO- $\beta$ +7  | -1.44               | 85                     | 1      | 11     | 0       | 2     |
| LUMO- $\beta$ +13 | -1.18               | 85                     | 0      | 13     | 0       | 2     |
| LUMO- $\beta$ +20 | -0.37               | 28                     | 65     | 4      | 2       | 1     |
| LUMO- $\beta$ +21 | -0.26               | 9                      | 82     | 5      | 2       | 2     |
| LUMO- $\beta$ +23 | -0.06               | 26                     | 63     | 7      | 2       | 3     |

**Table S24:** Atomic composition of molecular orbitals of [Ti<sub>7</sub>O<sub>5</sub>(OEt)<sub>19</sub>CoI] (B3LYP/6-31g\*, 6-311g\* (for iodine) level of theory).

| Orbital           | Orbital energy (eV) | Atomic composition (%) |        |        |        |       |
|-------------------|---------------------|------------------------|--------|--------|--------|-------|
|                   |                     | Titanium               | Cobalt | Oxygen | Iodine | Ethyl |
| HOMO- $\alpha$    | -5.44               | 0                      | 3      | 1      | 93     | 3     |
| HOMO- $\alpha$ -1 | -5.48               | 0                      | 4      | 1      | 94     | 2     |
| HOMO- $\alpha$ -2 | -5.84               | 1                      | 21     | 9      | 66     | 1     |
| LUMO              | -1.89               | 90                     | 0      | 9      | 0      | 2     |
| LUMO- $\alpha$ +1 | -1.79               | 87                     | 0      | 10     | 0      | 3     |
| LUMO- $\alpha$ +5 | -1.59               | 85                     | 0      | 11     | 0      | 3     |
| LUMO- $\alpha$ +6 | -1.54               | 86                     | 0      | 11     | 0      | 3     |
|                   |                     |                        |        |        |        |       |
| HOMO- $\beta$     | -5.27               | 0                      | 23     | 4      | 70     | 2     |
| HOMO- $\beta$ -1  | -5.36               | 1                      | 22     | 2      | 73     | 2     |
| HOMO- $\beta$ -2  | -6.08               | 0                      | 58     | 14     | 24     | 5     |
| HOMO- $\beta$ -3  | -6.19               | 0                      | 65     | 9      | 24     | 3     |
| LUMO- $\beta$     | -1.89               | 89                     | 1      | 8      | 0      | 1     |
| LUMO- $\beta$ +1  | -1.84               | 86                     | 4      | 8      | 0      | 2     |
| LUMO- $\beta$ +21 | -0.50               | 5                      | 87     | 5      | 1      | 2     |
| LUMO- $\beta$ +22 | -0.32               | 9                      | 80     | 7      | 2      | 2     |

**Table S25:** Atomic composition of molecular orbitals of [Ti<sub>7</sub>O<sub>4</sub>(OEt)<sub>20</sub>] (B3LYP/6-31g\* level of theory).

| Orbital | Orbital energy (eV) | Atomic composition |        |       |
|---------|---------------------|--------------------|--------|-------|
|         |                     | Titanium           | Oxygen | Ethyl |
| HOMO    | -6.54               | 2                  | 76     | 22    |
| LUMO    | -1.44               | 88                 | 10     | 2     |
| LUMO+1  | -1.40               | 89                 | 8      | 3     |

**Table S26:** Main orbital contributions to transition of [Ti<sub>7</sub>O<sub>5</sub>(OEt)<sub>19</sub>CoF] (with oscillator strengths  $\geq 0.001$ ). Calculated employing TD-DFT methods (B3LYP/6-31g\*).

| Main orbital contributions                                                                                                                                                                             | Eg (eV) | Eg (nm) | Oscillator strength |
|--------------------------------------------------------------------------------------------------------------------------------------------------------------------------------------------------------|---------|---------|---------------------|
| HOMO- $\beta$ -1 $\rightarrow$ LUMO- $\beta$ +22<br>HOMO- $\beta$ -1 $\rightarrow$ LUMO- $\beta$ +26<br>HOMO- $\beta$ $\rightarrow$ LUMO- $\beta$ +23<br>HOMO- $\beta$ $\rightarrow$ LUMO- $\beta$ +25 | 1.619   | 765.9   | 0.0013              |
| HOMO- $\beta$ -1 $\rightarrow$ LUMO- $\beta$ +1<br>HOMO- $\beta$ -1 $\rightarrow$ LUMO- $\beta$ +26                                                                                                    | 1.733   | 715.2   | 0.0014              |
| HOMO- $\beta$ -1 $\rightarrow$ LUMO- $\beta$ +1<br>HOMO- $\beta$ -1 $\rightarrow$ LUMO- $\beta$ +2<br>HOMO- $\beta$ $\rightarrow$ LUMO- $\beta$ +4                                                     | 2.748   | 451.1   | 0.0019              |
| HOMO- $\alpha$ $\rightarrow$ LUMO- $\alpha$                                                                                                                                                            | 3.394   | 365.3   | 0.0013              |
| HOMO- $\alpha$ -1 $\rightarrow$ LUMO- $\alpha$<br>HOMO- $\alpha$ $\rightarrow$ LUMO- $\alpha$ +1                                                                                                       | 3.462   | 358.1   | 0.0034              |
| HOMO- $\alpha$ -4 $\rightarrow$ LUMO- $\alpha$<br>HOMO- $\alpha$ $\rightarrow$ LUMO- $\alpha$ +1                                                                                                       | 3.486   | 355.7   | 0.0029              |
| HOMO- $\alpha$ -2 $\rightarrow$ LUMO- $\alpha$<br>HOMO- $\alpha$ $\rightarrow$ LUMO- $\alpha$ +2                                                                                                       | 3.557   | 348.6   | 0.0021              |
| HOMO- $\alpha$ -1 $\rightarrow$ LUMO- $\alpha$ +1<br>HOMO- $\beta$ -1 $\rightarrow$ LUMO- $\beta$ +14<br>HOMO- $\beta$ -1 $\rightarrow$ LUMO- $\beta$ +17                                              | 3.610   | 343.4   | 0.0014              |
| HOMO- $\alpha$ -2 $\rightarrow$ LUMO- $\alpha$ +1                                                                                                                                                      | 3.669   | 337.9   | 0.0022              |

|                                                                                                                                                     |       |       |        |
|-----------------------------------------------------------------------------------------------------------------------------------------------------|-------|-------|--------|
| HOMO- $\alpha$ -2 $\rightarrow$ LUMO- $\alpha$ +2<br>HOMO- $\beta$ -1 $\rightarrow$ LUMO- $\beta$ +15                                               |       |       |        |
| HOMO- $\alpha$ -1 $\rightarrow$ LUMO- $\alpha$ +2<br>HOMO- $\beta$ $\rightarrow$ LUMO- $\beta$ +16<br>HOMO- $\beta$ $\rightarrow$ LUMO- $\beta$ +18 | 3.691 | 335.9 | 0.0035 |

**Table S27:** Main orbital contributions to transition of  $[\text{Ti}_7\text{O}_5(\text{OEt})_{19}\text{CoCl}]$  (with oscillator strengths  $\geq 0.001$ ). Calculated employing TD-DFT methods (B3LYP/6-31g\*).

| Main orbital contributions                                                                                                                                  | Eg (eV) | Eg (nm) | Oscillator strength |
|-------------------------------------------------------------------------------------------------------------------------------------------------------------|---------|---------|---------------------|
| HOMO- $\beta$ -1 $\rightarrow$ LUMO- $\beta$ +20<br>HOMO- $\beta$ $\rightarrow$ LUMO- $\beta$ +21                                                           | 1.504   | 824.5   | 0.0019              |
| HOMO- $\beta$ -1 $\rightarrow$ LUMO- $\beta$ +20<br>HOMO- $\beta$ -1 $\rightarrow$ LUMO- $\beta$ +23<br>HOMO- $\beta$ -1 $\rightarrow$ LUMO- $\beta$ +24    | 1.682   | 737.3   | 0.0012              |
| HOMO- $\beta$ -1 $\rightarrow$ LUMO- $\beta$ +1<br>HOMO- $\beta$ -1 $\rightarrow$ LUMO- $\beta$ +2                                                          | 3.010   | 411.9   | 0.0011              |
| HOMO- $\alpha$ -2 $\rightarrow$ LUMO- $\alpha$<br>HOMO- $\alpha$ -1 $\rightarrow$ LUMO- $\alpha$<br>HOMO- $\alpha$ $\rightarrow$ LUMO- $\alpha$             | 3.520   | 352.2   | 0.0015              |
| HOMO- $\alpha$ -3 $\rightarrow$ LUMO- $\alpha$<br>HOMO- $\alpha$ -2 $\rightarrow$ LUMO- $\alpha$<br>HOMO- $\alpha$ $\rightarrow$ LUMO- $\alpha$             | 3.577   | 346.6   | 0.0012              |
| HOMO- $\alpha$ -4 $\rightarrow$ LUMO- $\alpha$<br>HOMO- $\alpha$ $\rightarrow$ LUMO- $\alpha$ +1                                                            | 3.596   | 344.8   | 0.0044              |
| HOMO- $\beta$ -1 $\rightarrow$ LUMO- $\beta$ +8<br>HOMO- $\beta$ -1 $\rightarrow$ LUMO- $\beta$ +13                                                         | 3.628   | 341.7   | 0.0023              |
| HOMO- $\alpha$ -3 $\rightarrow$ LUMO- $\alpha$ +1<br>HOMO- $\alpha$ -2 $\rightarrow$ LUMO- $\alpha$ +1<br>HOMO- $\alpha$ -1 $\rightarrow$ LUMO- $\alpha$ +1 | 3.716   | 333.7   | 0.0014              |

**Table S28:** Main orbital contributions to transition of  $[\text{Ti}_7\text{O}_5(\text{OEt})_{19}\text{CoBr}]$  (with oscillator strengths  $\geq 0.001$ ). Calculated employing TD-DFT methods (B3LYP/6-31g\*).

| Main orbital contributions                                                                                                                               | Eg (eV) | Eg (nm) | Oscillator strength |
|----------------------------------------------------------------------------------------------------------------------------------------------------------|---------|---------|---------------------|
| HOMO- $\beta$ $\rightarrow$ LUMO- $\beta$ +21                                                                                                            | 1.480   | 837.7   | 0.0025              |
| HOMO- $\beta$ -1 $\rightarrow$ LUMO- $\beta$ +20<br>HOMO- $\beta$ -1 $\rightarrow$ LUMO- $\beta$ +23                                                     | 1.675   | 740.1   | 0.0014              |
| HOMO- $\beta$ $\rightarrow$ LUMO- $\beta$ +7                                                                                                             | 3.144   | 394.4   | 0.0010              |
| HOMO- $\alpha$ -2 $\rightarrow$ LUMO- $\alpha$<br>HOMO- $\alpha$ $\rightarrow$ LUMO- $\alpha$                                                            | 3.421   | 362.4   | 0.0016              |
| HOMO- $\alpha$ -2 $\rightarrow$ LUMO- $\alpha$ +1<br>HOMO- $\alpha$ -2 $\rightarrow$ LUMO- $\alpha$ +2<br>HOMO- $\alpha$ $\rightarrow$ LUMO- $\alpha$ +1 | 3.49    | 355.5   | 0.0055              |
| HOMO- $\alpha$ -2 $\rightarrow$ LUMO- $\alpha$ +1<br>HOMO- $\alpha$ $\rightarrow$ LUMO- $\alpha$ +1                                                      | 3.513   | 353.9   | 0.0014              |
| HOMO- $\alpha$ -1 $\rightarrow$ LUMO- $\alpha$ +1                                                                                                        | 3.554   | 348.8   | 0.0015              |
| HOMO- $\alpha$ -4 $\rightarrow$ LUMO- $\alpha$                                                                                                           | 3.677   | 337.2   | 0.0010              |
| HOMO- $\alpha$ -4 $\rightarrow$ LUMO- $\alpha$<br>HOMO- $\alpha$ $\rightarrow$ LUMO- $\alpha$ +5<br>HOMO- $\alpha$ $\rightarrow$ LUMO- $\alpha$ +6       | 3.737   | 331.8   | 0.0021              |

**Table S29:** Main orbital contributions to transition of  $[\text{Ti}_7\text{O}_5(\text{OEt})_{19}\text{CoI}]$  (with oscillator strengths  $\geq 0.001$ ). Calculated employing TD-DFT methods (B3LYP/6-31g\*, 6-311g\* for iodine).

| Main orbital contributions                                                                                                                               | Eg (eV) | Eg (nm) | Oscillator strength |
|----------------------------------------------------------------------------------------------------------------------------------------------------------|---------|---------|---------------------|
| HOMO- $\beta$ -3 $\rightarrow$ LUMO- $\beta$ +21<br>HOMO- $\beta$ -2 $\rightarrow$ LUMO- $\beta$ +21<br>HOMO- $\beta$ $\rightarrow$ LUMO- $\beta$ +21    | 1.422   | 871.8   | 0.0031              |
| HOMO- $\beta$ -3 $\rightarrow$ LUMO- $\beta$ +22<br>HOMO- $\beta$ -2 $\rightarrow$ LUMO- $\beta$ +22<br>HOMO- $\beta$ -1 $\rightarrow$ LUMO- $\beta$ +22 | 1.668   | 743.4   | 0.0015              |
| HOMO- $\beta$ -1 $\rightarrow$ LUMO- $\beta$ +1                                                                                                          | 2.941   | 421.6   | 0.0018              |
| HOMO- $\beta$ $\rightarrow$ LUMO- $\beta$ +7                                                                                                             | 3.132   | 395.8   | 0.0011              |
| HOMO- $\alpha$ -2 $\rightarrow$ LUMO- $\alpha$                                                                                                           | 3.274   | 376.8   | 0.0016              |
| HOMO- $\alpha$ $\rightarrow$ LUMO- $\alpha$ +5<br>HOMO- $\alpha$ $\rightarrow$ LUMO- $\alpha$ +6                                                         | 3.363   | 368.6   | 0.0016              |
| HOMO- $\alpha$ -2 $\rightarrow$ LUMO- $\alpha$ +1                                                                                                        | 3.380   | 366.8   | 0.0069              |
| HOMO- $\beta$ -2 $\rightarrow$ LUMO- $\beta$                                                                                                             | 3.429   | 361.6   | 0.0011              |

**Table S30:** Main orbital contributions to transition of  $[\text{Ti}_7\text{O}_4(\text{OEt})_{20}]$  (with oscillator strengths  $\geq 0.001$ ). Calculated employing TD-DFT methods (B3LYP/6-31g\*).

| Main orbital contributions                           | Eg (eV) | Eg (nm) | Oscillator strength |
|------------------------------------------------------|---------|---------|---------------------|
| HOMO $\rightarrow$ LUMO<br>HOMO $\rightarrow$ LUMO+1 | 4.081   | 303.8   | 0.0025              |
| HOMO $\rightarrow$ LUMO+1                            | 4.174   | 297.1   | 0.0154              |

#### 4) Diffuse reflectance UV-vis spectroscopy

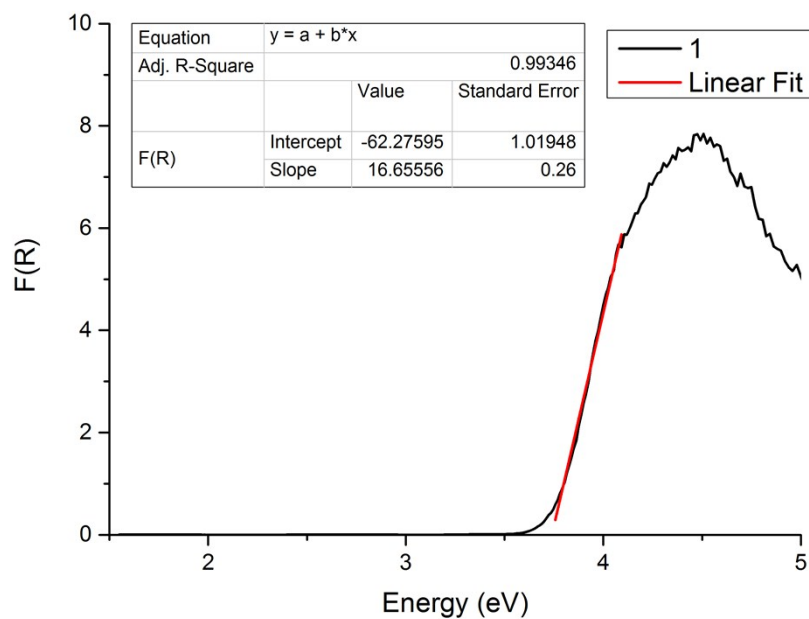

**Figure S5:** Diffuse reflectance UV-vis spectrum of  $[\text{Ti}_3\text{O}(\text{O}i\text{Pr})_9(\text{OMe})]$  and linear fit to determine band gap.

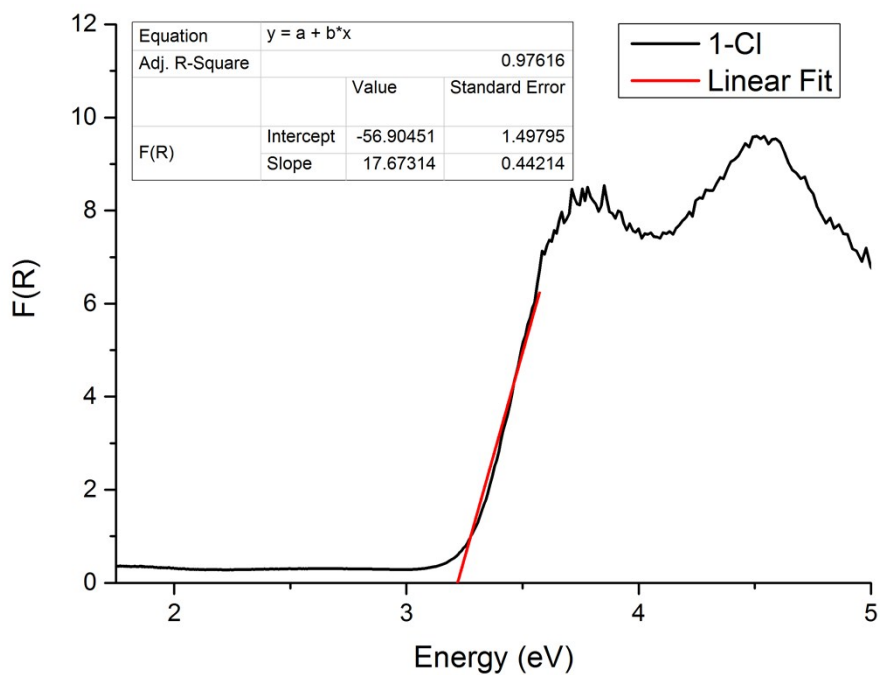

**Figure S6:** Diffuse reflectance UV-vis spectrum of  $[\text{Ti}_3\text{O}(\text{O}i\text{Pr})_9\text{Cl}]$  and linear fit to determine band gap.



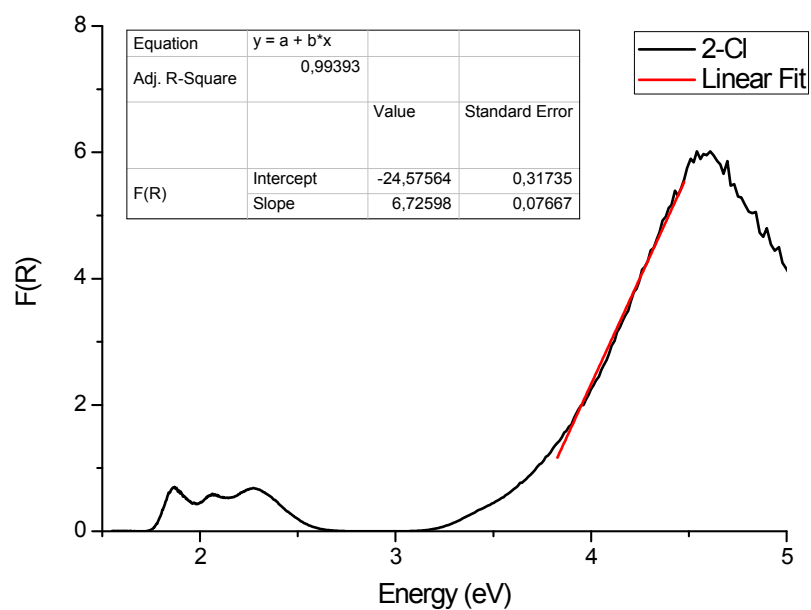

**Figure S7:** Diffuse reflectance UV-vis spectrum of  $[\text{Ti}_4\text{O}(\text{OEt})_{15}\text{CoCl}]$  and linear fit to determine band gap.

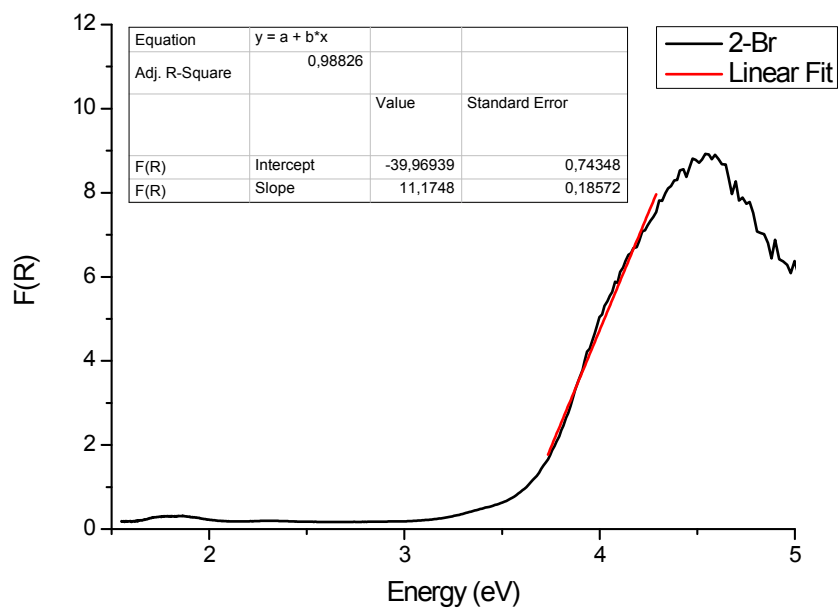

**Figure S8:** Diffuse reflectance UV-vis spectrum of  $[\text{Ti}_4\text{O}(\text{OEt})_{15}\text{CoBr}]$  and linear fit to determine band gap.

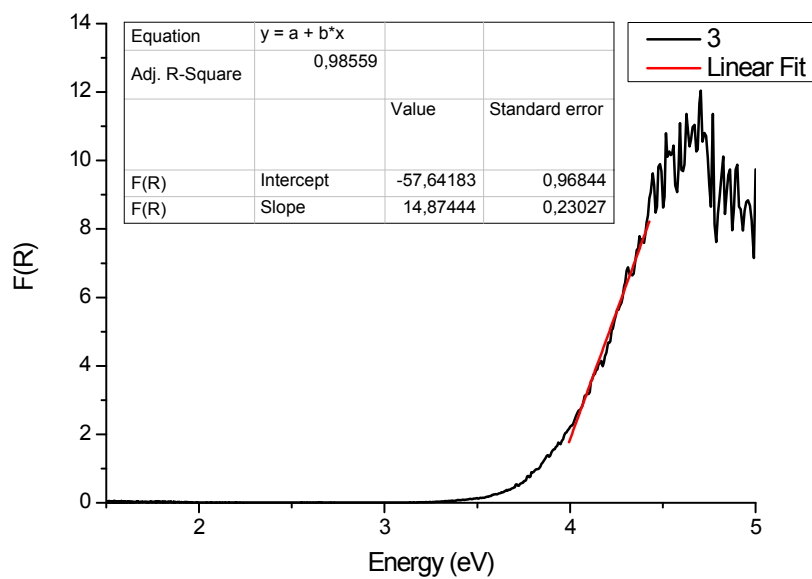

**Figure S9:** Diffuse reflectance UV-vis spectrum of  $[\text{Ti}_7\text{O}_4(\text{OEt})_{20}]$  and linear fit to determine band gap.

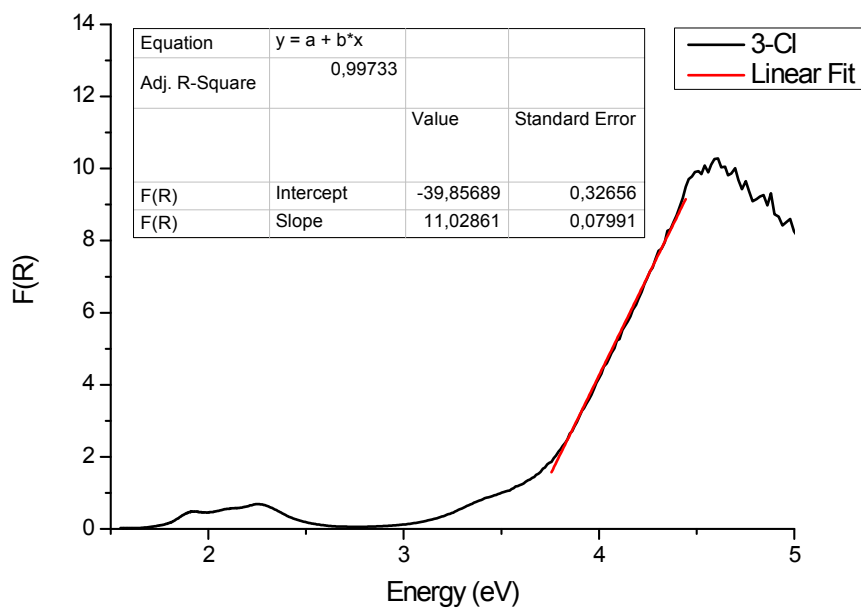

**Figure S10:** Diffuse reflectance UV-vis spectrum of  $[\text{Ti}_7\text{O}_5(\text{OEt})_{19}\text{CoCl}]$  and linear fit to determine band gap.

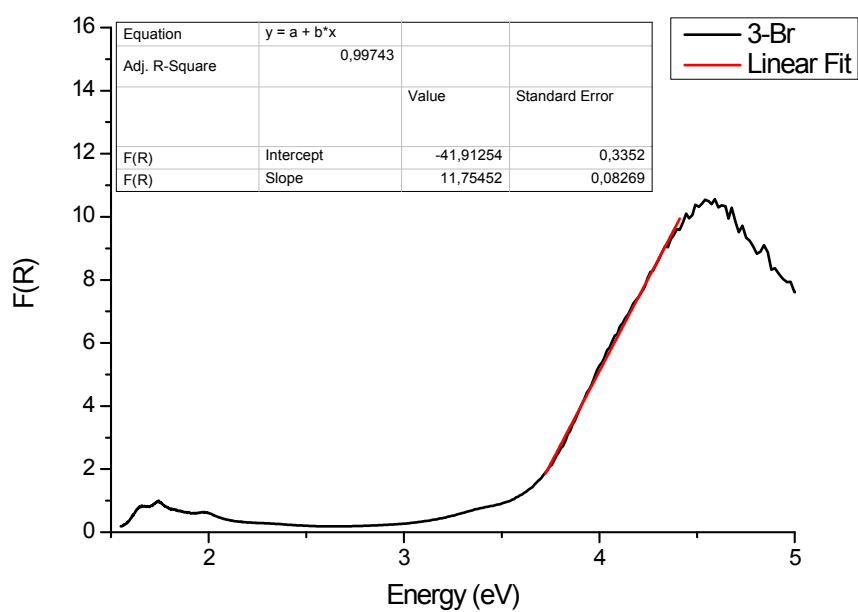

**Figure S11:** Diffuse reflectance UV-vis spectrum of  $[\text{Ti}_7\text{O}_5(\text{OEt})_{19}\text{CoBr}]$  and linear fit to determine band gap.

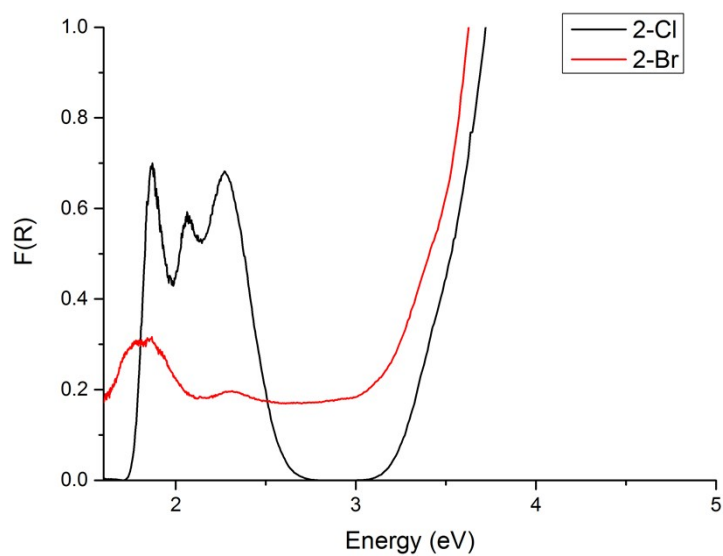

**Figure S12.** An expanded 500-700 nm region of diffuse reflection spectra for **2-Cl** and **2-Br** showing the absorbances for **2-Br**.

## 5) Single-crystal X-ray crystallography

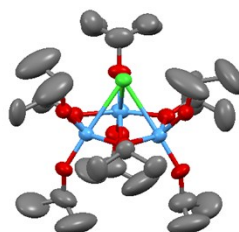

**Figure S13:** Structure of **1-Cl**. Displacement ellipsoids are drawn at the 50% probability level. H omitted for clarity. Blue = Ti, green = Cl, red = O, grey = C.

**Table S31:** Crystallographic data for **1-Cl**.

|                                      |                                                   |
|--------------------------------------|---------------------------------------------------|
| Compound                             | <b>1-Cl</b>                                       |
| Empirical formula                    | $C_{27}H_{63}ClO_{10}Ti_3$                        |
| Formula weight                       | 726.92                                            |
| Temperature                          | 180(2) K                                          |
| Wavelength                           | 0.7107 Å                                          |
| Crystal system                       | Tetragonal                                        |
| Space group                          | $P4_12_12$                                        |
| Unit cell dimensions                 | $a = 12.54740(10)$ Å                              |
|                                      | $b = 12.54740(10)$ Å                              |
|                                      | $c = 49.8245(5)$ Å                                |
|                                      | $\alpha = 90^\circ$                               |
|                                      | $\beta = 90^\circ$                                |
|                                      | $\gamma = 90^\circ$                               |
| Volume                               | $7844.23(15)$ Å <sup>3</sup>                      |
| Z                                    | 8                                                 |
| Absorption coefficient               | $0.707$ mm <sup>-1</sup>                          |
| Crystal size                         | $0.370 \times 0.160 \times 0.150$ mm <sup>3</sup> |
| Reflections collected                | 20677                                             |
| Independent reflections              | 6324 [ $R_{(int)} = 0.0554$ ]                     |
| Goodness-of-fit on F <sup>2</sup>    | 1.05                                              |
| Final R indices [ $I > 2\sigma(I)$ ] | $R_1 = 0.0598$ , $wR_2 = 0.1507$                  |
| R indices (all data)                 | $R_1 = 0.0970$ , $wR_2 = 0.1671$                  |
